# Supplementary material for: A Synthesis of Global Streamflow characteristics, Hydrometeorology, and catchment Attributes (GSHA) for Large Sample River-Centric Studies
Source: Copernicus journal article supplement (doi:10.5194/essd-2023-256), 2023-07-10
Supplement: Supplementary file [file essd-2023-256-CC2-supplement.pdf]

Dear Ather,

Thanks for your comment. We checked the links you mentioned. The Chinese National Real-time and Water Situation Database website can be fully accessed through Internet in China. The choice of web browsers or the restricted access for researchers outside of China may be the possible reasons for not able to opening it. Figure 1 provides a screenshot of the website.

For the Japanese link, it only brings you to parts of the dataset through direct links. Figure 2 to Figure 7 show the processes on how to access daily streamflow data for one Japanese gauge for one year, following the link we provided in the manuscript. Therefore, the general link <http://www1.river.go.jp/> could lead users to the entire dataset. For the Spanish dataset, the original link is indeed not straightforward as it directs users to all the yearbooks of Spain Anuario de Afors. After checking, we decided that <https://ceh.cedex.es/anuarioafors/demarcciones.asp> is a better link to the gauge information, which will be modified in the revised version of the manuscript.

Thanks again for your comment.

Tuesday, August 2023, 8 Welcome to the National Water and Rain Information Website!

**全国水雨情信息**

Home    Flood and drought warning    Water inquiries

Water conservancy scenic area

Focus on rain    Daily rainfall

Map query    Big rivers    Large reservoirs    conditions    nationwide

**Real-time water conditions in major rivers across the country**

Prepared by: Information Center of the Ministry of Water Resources    Statement date: 2023-08-01

| drainage basin                        | District                         | River name               | Station name                            | Time        | Water level (m) | Flow rate (m <sup>3</sup> /sec) | Alert water level (m) |
|---------------------------------------|----------------------------------|--------------------------|-----------------------------------------|-------------|-----------------|---------------------------------|-----------------------|
| Songhua River                         | Jilin Province                   | Nenjiang                 | Dazhao                                  | 08-01 14:00 | 129.44          | --                              | 131.74                |
| Heilongjiang                          | Jilin Province                   | Songhua River            | Buyeo                                   | 08-01 14:00 | 130.86          | 997                             | 133.56                |
| Inland rivers and lakes               | Xinjiang Uygur Autonomous Region | Bortala River            | hot spring                              | 08-01 14:00 | 1320.86         | 23                              | --                    |
| Inland rivers and lakes               | Xinjiang Uygur Autonomous Region | Jinghe                   | Seihe Pass (3)                          | 08-01 14:00 | 614.33          | 31                              | --                    |
| Manas River Lake                      | Xinjiang Uygur Autonomous Region | Manas river              | Kenswat                                 | 08-01 14:00 | 855.32          | 188                             | --                    |
| Inland rivers and lakes               | Xinjiang Uygur Autonomous Region | Urumsqi River            | Heroes Bridge (II) Hydrological Station | 08-01 08:00 | 1756.18         | 22                              | --                    |
| Inland rivers and lakes               | Xinjiang Uygur Autonomous Region | Reclamation of the river | Reclamation of the River (3)            | 08-01 14:00 | 1504.93         | 1                               | --                    |
| Inland rivers and lakes               | Xinjiang Uygur Autonomous Region | Alla Gou                 | Alagou (II)                             | 08-01 14:00 | 784.14          | --                              | --                    |
| The rivers of Hami and Turpan regions | Xinjiang Uygur Autonomous Region | Head ditch               | Head ditch                              | 08-01 14:00 | 1423.33         | --                              | --                    |

Figure 1 A screenshot of the Chinese National Real-time and Water Situation Database.

www1.river.go.jp

# Information System 文水質データベース

Ministry of Land, Infrastructure, Transport and Tourism  
者です。

このデータベースは水文水質にかかわる国土交通省水管理・国土保全局が所管する観測所における観測データを公開することを目的としています。  
掲載対象としているデータは、雨量、水位、流量、水質、底質、地下水位、地下水質、積雪深、ダム堰等の管理諸量、海象です。

| 観測所の検索                        |                             | ランキング検索                                          |                                                                                       |                         |
|-------------------------------|-----------------------------|--------------------------------------------------|---------------------------------------------------------------------------------------|-------------------------|
| <b>観測所諸元からの検索</b>             | <b>地図からの検索</b>              | <b>水系単位の観測所一括検索</b>                              | <b>雨量・水位ランキング</b>                                                                     | <b>主要洪水時データ検索</b>       |
| 観測項目、水系、所在地等を指定して、観測所を検索できます。 | 地図に表示された観測所位置から、観測所を検索できます。 | 水系を選択し、その水系内の雨量観測所、水位流量観測所を選択すると、観測データが一括検索できます。 | 雨量、水位の条件を指定してランキングを検索できます。<br>※累加期間の雨量および洪水期間の水位に欠測、閉局、推定値が含まれる場合、その洪水はランキング対象外となります。 | 過去の水害・被害額のランキングを検索できます。 |

Figure 2 A screenshot on how to search for data for a Japanese gauge.

Batch search conditions input for observatories for water systems

Name of the water system: Oho River      Observatory Search: clear

Observations:  Rainfall  water level  flow

When you select a system and observation items (rainfall, water level, flow rate), the corresponding observatory is displayed.

| NO                                    | Observations | Name of the water system | River name   | Name of observatory | location                                                                                |
|---------------------------------------|--------------|--------------------------|--------------|---------------------|-----------------------------------------------------------------------------------------|
| <input checked="" type="checkbox"/> 2 | flow rate    | Goshiribetsu             | Goshiribetsu | Shanglibei          | Hokkaido Setana-gun Imakane-cho Mirikawa National Forest 4170 Hayashi Barro Small Group |
| <input type="checkbox"/> 3            | flow rate    | Goshiribetsu             | Goshiribetsu | Flower stone        | 226 Nakazato, Imakane-cho, Setana-gun, Hokkaido                                         |
| <input type="checkbox"/> 4            | flow rate    | Goshiribetsu             | Goshiribetsu | Sumiyoshi           | 269-1 Sumiyoshi, Imakane-cho, Setana-gun, Hokkaido                                      |
| <input type="checkbox"/> 5            | flow rate    | Goshiribetsu             | Goshiribetsu | Jinjin              | 65-6 Tashiro, Imakane-cho, Setana-gun, Hokkaido                                         |
| <input type="checkbox"/> 6            | flow rate    | Goshiribetsu             | Goshiribetsu | Big rich            | 1869 Nishi-Niwa, Kitahiyama-ku, Setana-cho, Kuon-gun, Hokkaido                          |
| <input type="checkbox"/> 7            | flow rate    | Goshiribetsu             | Goshiribetsu | estuary             | 17 Minamikawa, Setana-cho, Setana-cho, Kuon-gun, Hokkaido                               |
| <input type="checkbox"/> 8            | flow rate    | Goshiribetsu             | Pinkabetsu   | Merikawa            | Hokkaido Setana-gun Imakane Town National Forest                                        |
| <input type="checkbox"/> 9            | flow rate    | Goshiribetsu             | Chushibetsu  | Loyalty             | Hokkaido Setana-gun Imakane-cho National Forest 4162 Hayashi Group Ro Small Group       |

Figure 3 A screenshot on how to select a Japanese gauge.

www1.river.go.jp/cgi-bin/SrchSiteSuiData2.exe?SUIKEI=90509000&BGNDATE=20230725&ENDDATE=20230801&ID=301051281102020:0202;

**水系一括検索**

水系名: 大保川

観測日時:  観測項目:  流量  水位

[-] は未受信  
黒字: 確定値  
青字: 暫定値

Figure 4 A screenshot on how to access the details of a Japanese gauge.

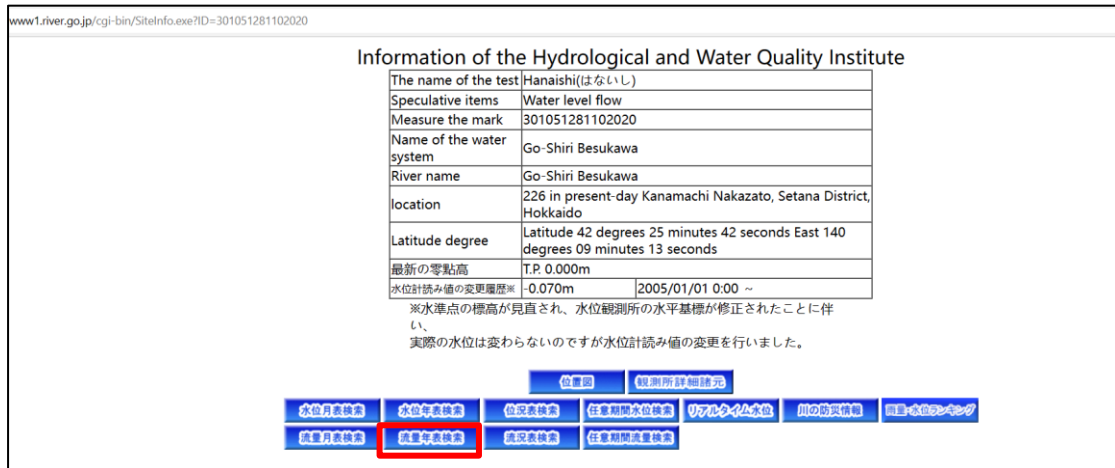

Figure 5 A screenshot on how to search for the hydrological variable-of-interest selected Japanese gauge.

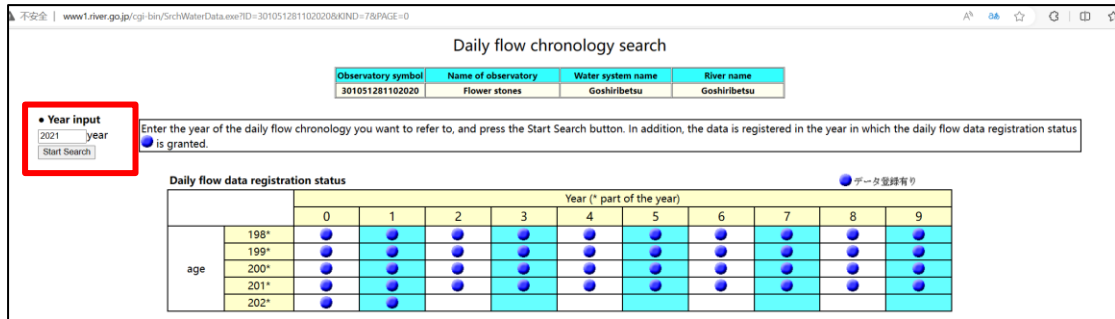

Figure 6 Decide the temporal extent.

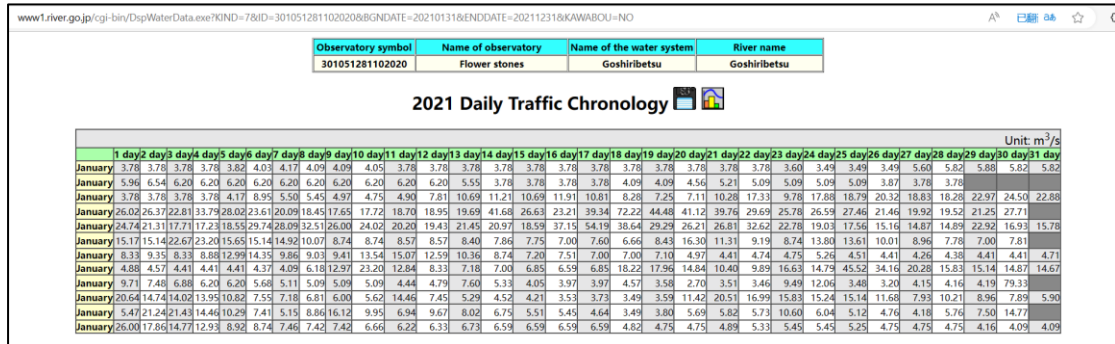

Figure 7 Access the flow data.
